# Supplementary material for: Expression of G3BP1 in benign and malignant human prostate tissues
Source: PubMed Central journal article supplement — Transl Androl Urol. 2021 Apr;10(4):1665–75. doi: 10.21037/tau-20-1450 (PMC8100838; doi:10.21037/tau-20-1450), 2021-04
Supplement: tau-10-04-1665-supplementary.pdf [file tau-10-04-1665-supplementary.pdf]

**Table S1** Statistical significance of G3BP1 expression based on Gleason score by UALCAN

| Comparison                           | Statistical significance |
|--------------------------------------|--------------------------|
| Normal-vs.-Gleason score 6           | 9.782400E-01             |
| Normal-vs.-Gleason score 7           | 6.799300E-04             |
| Normal-vs.-Gleason score 8           | 8.379100E-03             |
| Normal-vs.-Gleason score 9           | 1.23409999996937E-06     |
| Normal-vs.-Gleason score 10          | 1.500780E-01             |
| Gleason score 6-vs.-Gleason score 7  | 1.338500E-02             |
| Gleason score 6-vs.-Gleason score 8  | 2.462200E-02             |
| Gleason score 6-vs.-Gleason score 9  | 1.809830E-04             |
| Gleason score 6-vs.-Gleason score 10 | 2.498600E-03             |
| Gleason score 7-vs.-Gleason score 8  | 8.540000E-01             |
| Gleason score 7-vs.-Gleason score 9  | 4.364300E-02             |
| Gleason score 7-vs.-Gleason score 10 | 2.298400E-02             |
| Gleason score 8-vs.-Gleason score 9  | 2.035400E-01             |
| Gleason score 8-vs.-Gleason score 10 | 3.712100E-02             |
| Gleason score 9-vs.-Gleason score 10 | 5.259600E-02             |

Significance of difference estimated by Student's *t*-test. G3BP1, GTPase-activating protein SH3 domain-binding protein 1.
